# Supplementary material for: Rutin Is a Low Micromolar Inhibitor of SARS-CoV-2 Main Protease 3CLpro: Implications for Drug Design of Quercetin Analogs
Source: Biomedicines. 2021 Apr 2;9(4):375. doi: 10.3390/biomedicines9040375 (PMC8066963; doi:10.3390/biomedicines9040375)
Supplement: Supplementary file 1 [file biomedicines-09-00375-s001.pdf]

## Supplementary Material

# Rutin Is a Low Micromolar Inhibitor of SARS-CoV-2 Main Protease 3CLpro: Implications for Drug Design of Quercetin Analogs

Bruno Rizzuti <sup>1,2\*</sup>, Fedora Grande <sup>3</sup>, Filomena Conforti <sup>3</sup>, Ana Jimenez-Alesanco <sup>2,4</sup>, Laura Ceballos-Laita <sup>2,5</sup>, David Ortega-Alarcon <sup>2,4</sup>, Sonia Vega <sup>2</sup>, Hugh T. Reyburn <sup>6</sup>, Olga Abian <sup>2,4,5,7,8\*</sup> and Adrian Velazquez-Campoy <sup>2,4,5,8,9\*</sup>

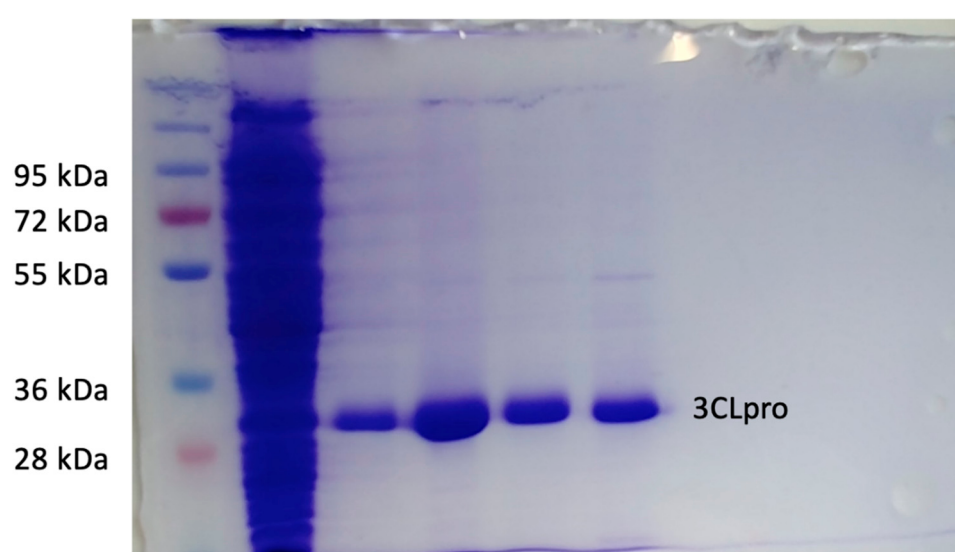

**Figure S1.** SDS-PAGE showing the result of the final purification step for SARS-CoV-2 3CLpro.

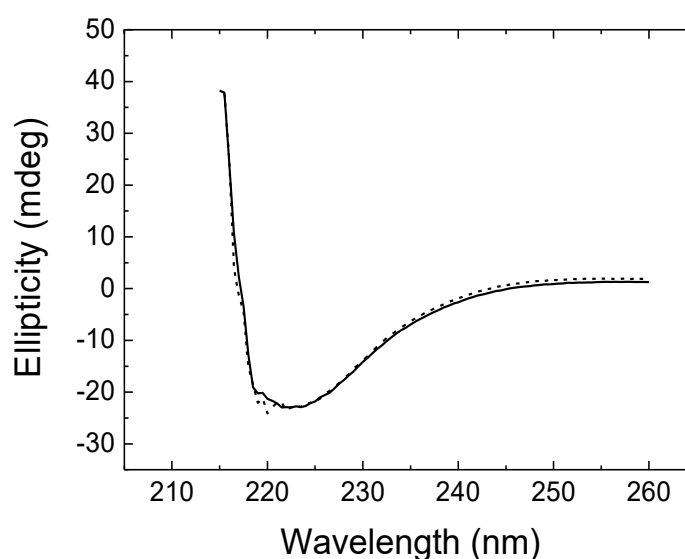

**Figure S2.** Far-UV circular dichroism spectrum of the 3CLpro-rutin complex (continuous line) and addition of individual spectra of 3CLpro and rutin (dashed line), recorded at 10  $\mu$ M protein concentration and 100  $\mu$ M ligand concentration, under the same conditions. The presence of DMSO at low concentration caused degradation of the signal below 215 nm, as reported previously (Abian et al. *Int. J. Biol. Macromol.* **2020**, *164*, 1693–1703).
